# Supplementary material
Source: PubMed Central journal article supplement (PMC3590042)
Supplement: supp_kws209_kws209_Web_Material.pdf [file supp_kws209_kws209_Web_Material.pdf]

## WEB APPENDIX

### Distribution of Lognormal Biomarkers with Error

Let  $X \sim \text{logNormal}$ , implying that  $\log(X) \sim N(\mu_X, \sigma_X^2)$ . The mean and variance of  $X$  in terms of  $\mu_X$  and  $\sigma_X^2$  are  $E[X] = e^{\mu_X + 0.5\sigma_X^2}$  and  $\text{Var}[X] = (e^{\sigma_X^2} - 1)e^{2\mu_X + \sigma_X^2}$ , respectively.

Suppose  $X^* = X + \varepsilon$ , where  $\varepsilon \sim N(0, \sigma_\varepsilon^2)$  is the measurement error and is independent of  $X$ . The distribution of  $X^*$  is the convolution of a lognormal and normal random variables without a closed form but with the following mean and variance

$$\begin{aligned} E[X^*] &= E[X] + E[\varepsilon] \\ &= e^{\mu_X + 0.5\sigma_X^2} + \sigma_\varepsilon^2 \end{aligned}$$

and

$$\begin{aligned} \text{Var}[X^*] &= \text{Var}[X] + \text{Var}[\varepsilon] \\ &= (e^{\sigma_X^2} - 1)e^{2\mu_X + \sigma_X^2} + \sigma_\varepsilon^2 \end{aligned}$$

, respectively.

Assuming the availability of the mean and variance from the measurements  $X^*$  and the measurement error  $\varepsilon$ , we can solve for the parameters of interest  $\mu_X$  and  $\sigma_X^2$ .

Let  $R$  be the ratio or proportion of total variability attributable to the actual biomarker

$$R = \frac{\text{Var}[X]}{\text{Var}[X^*]} = \frac{\text{Var}[X]}{\text{Var}[X] + \text{Var}[\varepsilon]}$$

then,

$$\begin{aligned}
\text{Var}[X] &= \text{Var}[X^*] - \sigma_\varepsilon^2 \\
(e^{\sigma_X^2} - 1)e^{2\mu_X + \sigma_X^2} &= \text{Var}[X^*] - \sigma_\varepsilon^2 \\
(e^{\sigma_X^2} - 1)E[X^*]^2 &= \text{Var}[X^*] - \sigma_\varepsilon^2 \\
\sigma_X^2 &= \log \left[ \frac{(\text{Var}[X^*] - \sigma_\varepsilon^2)}{E[X^*]^2} + 1 \right] \\
\sigma_X^2 &= \log \left[ \frac{(R \cdot \text{Var}[X^*])}{E[X^*]^2} + 1 \right]
\end{aligned}$$

and

$$\begin{aligned}
E[X^*] &= E[X] \\
E[X^*] &= e^{\mu_X + 0.5\sigma_X^2} \\
\mu_X &= \log[E[X^*]] - 0.5\sigma_X^2
\end{aligned}$$

Specifically the cadmium and lead exposures here reasonably follow lognormal distributions and can be characterized by component wise exponentiation multivariate normal distribution,

$$\vec{U} \sim N \left( \vec{\mu}_U = \begin{pmatrix} \mu_{\log cd} \\ \mu_{\log pb} \end{pmatrix}, \Sigma_U = \begin{bmatrix} \sigma_{\log cd}^2 & \rho_x \sigma_{\log cd} \sigma_{\log pb} \\ \rho_x \sigma_{\log cd} \sigma_{\log pb} & \sigma_{\log pb}^2 \end{bmatrix} \right).$$

Parameter values in our simulations were chosen based on observed levels in the BioCycle Study with consideration to varying levels of measurement error,  $\mu_{\log cd} = \log(0.34) - 0.5 \times \sigma_{\log cd}^2$ ,  $\sigma_{\log cd}^2 = \log \left( R \times \frac{0.05}{0.34^2} + 1 \right)$  and  $\mu_{\log pb} = \log(1.02) - 0.5 \times \sigma_{\log pb}^2$ ,  $\sigma_{\log pb}^2 = \log \left( R \times \frac{0.40}{1.02^2} + 1 \right)$ . Next, we constructed cadmium and lead exposures measured with mean 0 and multivariate normally distributed error,

such that  $\vec{X}^* = \vec{X} + \vec{\varepsilon}$ , where  $\vec{\varepsilon} \sim N \left( \vec{\mu}_\varepsilon = \begin{pmatrix} 0 \\ 0 \end{pmatrix}, \Sigma_\varepsilon = \begin{bmatrix} \sigma_{\varepsilon cd}^2 & \rho_\varepsilon \sigma_{\varepsilon cd} \sigma_{\varepsilon pb} \\ \rho_\varepsilon \sigma_{\varepsilon cd} \sigma_{\varepsilon pb} & \sigma_{\varepsilon pb}^2 \end{bmatrix} \right)$ ,

$\sigma_{\varepsilon cd}^2 = (1 - R) * 0.05$  and  $\sigma_{\varepsilon pb}^2 = (1 - R) * 0.40$ . This method was used for all the scenarios of correlations and  $R$ .

**Web Figure 1.** Directed acyclic graph of the association between cadmium ( $X_1$ ), lead ( $X_2$ ), measured cadmium ( $X_1^*$ ), measured lead ( $X_2^*$ ), true correlation between biomarkers ( $U_1=\rho_x$ ), error correlation ( $U_2=\rho_\varepsilon$ ) and anovulation ( $Y$ ).

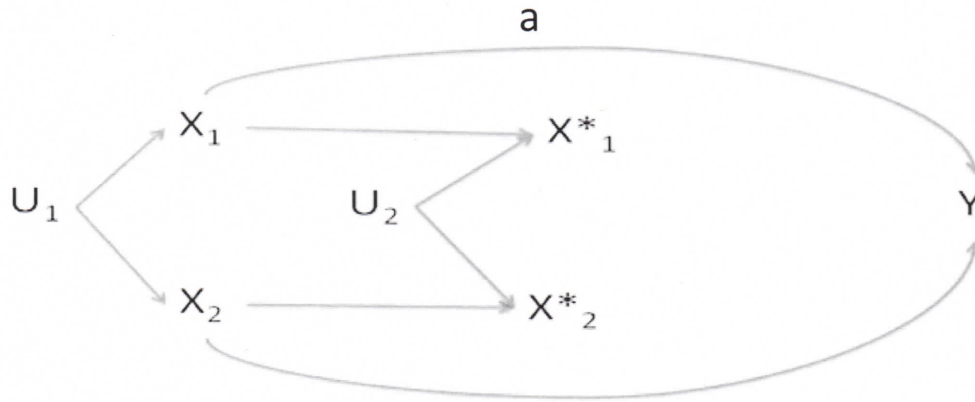

**b**  
**Linear Approximation to Logistic Bias**

Since

$$\beta = cov(X^*)^{-1}cov(X^*, Y)$$

$$cov(X_1^*, Y) = cov(X_1 + \varepsilon_1, Y) = cov(X_1, Y) = a$$

$$cov(X_2^*, Y) = cov(X_2 + \varepsilon_2, Y) = cov(X_2, Y) = b,$$

we have  $\beta = cov(X^*)^{-1} \begin{pmatrix} a \\ b \end{pmatrix}$ .

Since

$$\beta_{true} = cov(X)^{-1}cov(X, Y)$$

$$cov(X) = cov(X^* - \varepsilon) = cov(X^*) + cov(\varepsilon),$$

we have  $\beta_{true} = [cov(X^*) + cov(\varepsilon)]^{-1} \begin{pmatrix} a \\ b \end{pmatrix}$ .

$$\begin{aligned}
\text{Bias} &= \beta - \beta_{\text{true}} \\
&= \left[ (\text{cov}(X) + \text{cov}(\varepsilon))^{-1} - (\text{cov}(X))^{-1} \right] \text{cov}(X, Y) \\
&= \left\{ \begin{pmatrix} \sigma_1^2 & \rho\sigma_1\sigma_2 \\ \rho\sigma_1\sigma_2 & \sigma_2^2 \end{pmatrix}^{-1} - \begin{pmatrix} \sigma_1^2 + \sigma_{\varepsilon 1}^2 & \rho\sigma_1\sigma_2 + \rho_{\varepsilon}\sigma_{\varepsilon 1}\sigma_{\varepsilon 2} \\ \rho\sigma_1\sigma_2 + \rho_{\varepsilon}\sigma_{\varepsilon 1}\sigma_{\varepsilon 2} & \sigma_2^2 + \sigma_{\varepsilon 2}^2 \end{pmatrix}^{-1} \right\} \begin{pmatrix} a \\ b \end{pmatrix}.
\end{aligned}$$

**Web Figure 2.** Levels of bias for main effects models for closed form solution under varying levels of correlation between biomarkers ( $\rho_x$ ) and error correlation ( $\rho_e$ ) for the association between two continuous exposure biomarkers and continuous outcome under high levels of measurement error ( $R=0.50$ ) for main effects of OR=0.75 (circle), 1.00 (triangle), 1.25 (+), 1.75 (x). Level of  $\rho_x$  varies along the top panel. Points between  $-0.6$  and  $0.6$  are noted within each figure and refer to levels of  $\rho_e$ .

**Web Table 1.** Relative percent bias (mean squared error) for main effects models of the association between cadmium (Cd), lead (Pb) and anovulation, with moderate levels of measurement error ( $R=0.80$ ) for OR 0.75 and OR 1.75 for  $n=200$ , for varying levels of correlation between biomarkers and error correlation

|               | $\rho_\varepsilon -0.6$ |               | $\rho_\varepsilon 0.0$ |               | $\rho_\varepsilon 0.6$ |               |
|---------------|-------------------------|---------------|------------------------|---------------|------------------------|---------------|
|               | Cd                      | Pb            | Cd                     | Pb            | Cd                     | Pb            |
| OR = 0.75     |                         |               |                        |               |                        |               |
| $\rho_x -0.6$ | -16.17 (0.60)           | -16.23 (0.08) | -47.76 (0.53)          | -26.35 (0.07) | -79.34 (0.58)          | -31.52 (0.08) |
| $\rho_x -0.2$ | 10.04 (0.47)            | -11.77 (0.06) | -23.14 (0.46)          | -19.46 (0.06) | -55.64 (0.47)          | -21.90 (0.07) |
| $\rho_x 0.0$  | 11.80 (0.45)            | -11.00 (0.06) | -6.87 (0.45)           | -17.44 (0.07) | -46.23 (0.49)          | -17.87 (0.06) |
| $\rho_x 0.2$  | 16.85 (0.45)            | -12.48 (0.06) | -12.73 (0.44)          | -16.38 (0.06) | 43.29 (0.50)           | -13.60 (0.07) |
| $\rho_x 0.6$  | 43.12 (0.52)            | -14.60 (0.07) | 13.68 (0.59)           | -20.39 (0.08) | -18.99 (0.67)          | -18.28 (0.09) |
| OR = 1.75     |                         |               |                        |               |                        |               |
| $\rho_x -0.6$ | -10.33 (0.60)           | -18.56 (0.11) | -43.36 (0.65)          | -26.42 (0.11) | -73.42 (0.77)          | -31.55 (0.13) |
| $\rho_x -0.2$ | 8.19 (0.49)             | -14.41 (0.08) | -23.83 (0.50)          | -22.28 (0.10) | -48.19 (0.59)          | -24.28 (0.10) |
| $\rho_x 0.0$  | 13.34 (0.49)            | -14.69 (0.08) | -15.30 (0.46)          | -19.28 (0.09) | -43.83 (0.57)          | -23.72 (0.10) |
| $\rho_x 0.2$  | 17.84 (0.48)            | -14.13 (0.08) | -16.18 (0.48)          | -19.84 (0.08) | -36.53 (0.56)          | -19.81 (0.09) |
| $\rho_x 0.6$  | 39.67 (0.61)            | -19.68 (0.09) | 6.39 (0.60)            | -20.55 (0.10) | -19.57 (0.74)          | -23.14 (0.13) |



**Web Table 2.** Relative percent bias (mean squared error) for models of an interaction (CdxPb) between cadmium (Cd), lead (Pb) and anovulation, with moderate levels of measurement error ( $R = 0.80$ ) for OR 0.75 and OR 1.75 for  $n = 200$ , for varying levels of correlation between biomarkers and error correlation

|               | $\rho_\varepsilon -0.6$ |               |               | $\rho_\varepsilon 0.0$ |               |                | $\rho_\varepsilon 0.6$ |               |                |
|---------------|-------------------------|---------------|---------------|------------------------|---------------|----------------|------------------------|---------------|----------------|
|               | Cd                      | Pb            | CdxPb         | Cd                     | Pb            | CdxPb          | Cd                     | Pb            | CdxPb          |
| OR = 0.75     |                         |               |               |                        |               |                |                        |               |                |
| $\rho_x -0.6$ | 58.05 (1.52)            | 7.46 (0.18)   | -81.71 (1.94) | 47.21 (1.65)           | 5.28 (0.19)   | -119.88(2.29)  | -43.29 (1.72)          | 8.22 (0.20)   | -152.28(2.66)  |
| $\rho_x -0.2$ | 50.30 (1.82)            | 3.47 (0.21)   | -42.98 (1.68) | 23.28 (1.87)           | -2.58 (0.22)  | -57.37 (1.76)  | -0.70 (1.94)           | -7.28 (0.23)  | -71.89 (1.92)  |
| $\rho_x 0.0$  | 42.63 (1.98)            | -1.83 (0.23)  | -25.75 (1.61) | 2.64 (2.06)            | -10.12 (0.23) | -35.83 (1.68)  | -32.77 (2.06)          | -18.43 (0.24) | -35.66 (1.65)  |
| $\rho_x 0.2$  | 35.25 (2.22)            | -8.95 (0.26)  | -7.33 (1.64)  | -17.87 (2.21)          | -21.37 (0.26) | -5.71 (1.65)   | -70.03 (2.21)          | -32.51 (0.27) | 2.74 (1.56)    |
| $\rho_x 0.6$  | -26.24 (2.58)           | -38.71 (0.32) | 41.83 (1.64)  | -81.61 (2.50)          | -52.57 (0.33) | -49.92 (1.53)  | -139.49 (2.71)         | -58.00 (0.33) | 56.44 (1.46)   |
| OR = 1.75     |                         |               |               |                        |               |                |                        |               |                |
| $\rho_x -0.6$ | 51.96 (1.72)            | 5.21 (0.20)   | -84.04 (2.80) | 35.65 (1.78)           | 1.99 (0.21)   | -118.26 (3.89) | 23.62 (1.82)           | 1.26 (0.23)   | -141.12 (4.83) |
| $\rho_x -0.2$ | 68.08 (2.28)            | 6.15 (0.24)   | -56.50 (2.32) | 33.79 (2.11)           | -1.83 (0.25)  | -70.09 (2.63)  | 10.77 (2.04)           | -4.14 (0.26)  | 84.31 (2.91)   |
| $\rho_x 0.0$  | 56.26 (2.43)            | -0.60 (0.26)  | -37.73 (2.17) | 16.45 (2.24)           | -10.00 (0.27) | -46.58 (2.22)  | -17.29 (2.13)          | -15.36 (0.28) | 53.18 (2.21)   |
| $\rho_x 0.2$  | 49.05 (2.61)            | -5.22 (0.30)  | -23.63 (2.10) | -4.21 (2.28)           | -18.51 (0.30) | -22.97 (1.96)  | -44.51(2.44)           | -26.75 (0.32) | 22.96 (1.90)   |
| $\rho_x 0.6$  | 17.94 (3.01)            | -27.14 (0.39) | 12.34 (2.25)  | -56.11 (3.17)          | -44.03 (0.47) | 29.24 (2.31)   | -107.94 (3.58)         | -51.53 (0.50) | 33.50 (2.11)   |
